# Supplementary material for: Zirconium complexes of cyclopenta[b]pyridine: synthesis, structure, and olefin polymerization catalysis
Source: Royal Society of Chemistry journal article supplement (doi:10.1039/b201829b), 2002-01-01
Supplement: b201829b.pdf [file b201829b.pdf]

## Supplementary information

### Zirconium Complexes of Cyclopenta[*b*]pyridine:

#### Synthesis, Structure, and Olefin Polymerization Catalysis †

Alexey N. Ryabov,<sup>a</sup> Vyatcheslav V. Izmer,<sup>a</sup> Anatoly A. Borisenko,<sup>a</sup>

Jo Ann M. Canich,<sup>b</sup> Lyudmila G. Kuz'mina,<sup>c</sup> Judith A. K. Howard<sup>d</sup>

and Alexander Z. Voskoboynikov \*<sup>a</sup>

### Characterization data

**1-(Trimethylsilyl)-1*H*-cyclopenta[*b*]pyridine (1).** Anal. calc. for C<sub>11</sub>H<sub>15</sub>NSi: C, 69.78; H, 7.99. Found: C, 70.11; H, 8.08. <sup>1</sup>H NMR (CDCl<sub>3</sub>): δ 8.03 (dt, J= 7.33 Hz, J= 1.17 Hz, 1H, 4-H in Cp<sup>Py</sup>), 7.55 (dd, J= 6.15 Hz, J= 0.59 Hz, 1H, 2-H in Cp<sup>Py</sup>), 7.37 (dd, J= 4.10 Hz, J= 3.51 Hz, 1H, 6-H in Cp<sup>Py</sup>), 6.63 (dd, J= 7.32 Hz, J= 6.15 Hz, 1H, 3-H in Cp<sup>Py</sup>), 6.53 (dd, J= 4.69 Hz, J= 1.46 Hz, 1H, 7-H in Cp<sup>Py</sup>), 6.26 (dt, J= 3.51 Hz, J= 1.18 Hz, 1H, 5-H in Cp<sup>Py</sup>), 0.71 (s, 9H, Me<sub>3</sub>Si). <sup>13</sup>C{<sup>1</sup>H} NMR (CDCl<sub>3</sub>): δ 147.6, 130.6, 130.3, 128.8, 119.1, 105.5, 99.1, 92.5, 0.8.

**Cp<sup>Py</sup>Li.** <sup>1</sup>H NMR (THF-*d*<sub>8</sub>): δ 7.52 (ddd, J= 7.52 Hz, J= 1.36 Hz, J= 1.03 Hz, 1H, 2-H in Cp<sup>Py</sup>), 7.48 (dd, J= 4.78 Hz, J= 1.36 Hz, 1H, 4-H in Cp<sup>Py</sup>), 6.81 (t, J= 3.76 Hz, 1H, 6-H in Cp<sup>Py</sup>), 6.22 (dd, J= 7.52 Hz, J= 4.79 Hz, 1H, 3-H in Cp<sup>Py</sup>), 5.86-5.89 (m, 2H, 5,7-H<sub>2</sub> in Cp<sup>Py</sup>).

**Cp\*ZrCl<sub>3</sub>.** Anal. calc. for C<sub>10</sub>H<sub>15</sub>Cl<sub>3</sub>Zr: C, 36.09; H, 4.54. Found: C, 36.13; H, 4.50. <sup>1</sup>H NMR (C<sub>6</sub>D<sub>5</sub>CD<sub>3</sub>): δ 2.17 (s, Δ*v*<sub>1/2</sub>= 12.0 Hz, C<sub>5</sub>Me<sub>5</sub>). <sup>13</sup>C{<sup>1</sup>H}NMR (C<sub>6</sub>D<sub>5</sub>CD<sub>3</sub>): δ 130.45 (C<sub>5</sub>Me<sub>5</sub>), 13.31 (C<sub>5</sub>Me<sub>5</sub>).

**Cp<sup>Py</sup>Cp\*ZrCl<sub>2</sub> (2).** Anal. calc. for C<sub>18</sub>H<sub>21</sub>NCl<sub>2</sub>Zr: C, 52.28; H, 5.12. Found: C, 52.44; H, 5.04. <sup>1</sup>H NMR (CD<sub>2</sub>Cl<sub>2</sub>): 8.69 (dd, J= 4.15 Hz, J= 1.46 Hz, 1H, 2-H in Cp<sup>Py</sup>), 7.93 (ddd, J= 8.55 Hz, J= 1.47 Hz, J= 0.98 Hz, 1H, 4-H in Cp<sup>Py</sup>), 7.08 (dd, J= 8.54 Hz, J= 4.15 Hz, 1H, 3-H in Cp<sup>Py</sup>), 6.41 (dd, J= 3.91 Hz, J= 3.17 Hz, 1H, 6-H in Cp<sup>Py</sup>), 6.32 (dd, J= 3.90 Hz, J= 2.20 Hz, 1H, 7-H in Cp<sup>Py</sup>), 6.23 (ddd, J= 3.17 Hz, J= 2.19 Hz, J= 0.98 Hz, 1H, 5-H in Cp<sup>Py</sup>), 2.00 (s, 15H, Cp\*). <sup>13</sup>C{<sup>1</sup>H} NMR (CD<sub>2</sub>Cl<sub>2</sub>):<sup>10</sup> δ 152.3 (2-C in Cp<sup>Py</sup>), 145.8 (8-C in Cp<sup>Py</sup>), 133.1 (4-C in Cp<sup>Py</sup>),

127.3 (9-C in Cp<sup>Py</sup>), 124.5 (C<sub>5</sub>Me<sub>5</sub>), 119.9 (3-C in Cp<sup>Py</sup>), 115.9 (6-C in Cp<sup>Py</sup>), 105.7 (7-C in Cp<sup>Py</sup>), 99.8 (5-C in Cp<sup>Py</sup>), 12.0 (C<sub>5</sub>Me<sub>5</sub>).

**Cp<sup>Py</sup>Zr(NMe<sub>2</sub>)<sub>3</sub>(NHMe<sub>2</sub>) (3).** Anal. calc. for C<sub>16</sub>H<sub>31</sub>N<sub>5</sub>Zr: C, 49.96; H, 8.12. Found: C, 50.24; H, 8.19. <sup>1</sup>H NMR (CD<sub>2</sub>Cl<sub>2</sub>): at 20°C, δ 7.77 (d, J= 7.82 Hz, 1H, 2-H in Cp<sup>Py</sup>), 7.61 (br.s, 1H, 4-H in Cp<sup>Py</sup>), 6.92 (t, J= 3.67 Hz, 1H, 6-H in Cp<sup>Py</sup>), 6.45 (dd, J= 7.57 Hz, J= 5.12 Hz, 1H, 3-H in Cp<sup>Py</sup>), 6.11 (dd, J= 3.91 Hz, J= 1.46 Hz, 1H, 7-H in Cp<sup>Py</sup>), 5.98 (br.s, 1H, 5-H in Cp<sup>Py</sup>), 2.96 (br.s, 18H, Zr(NMe<sub>2</sub>)<sub>3</sub>), 2.33 (br.d, J= 6.45 Hz, 6H, Zr(HNMe<sub>2</sub>)), Me<sub>2</sub>NH resonance was not observed; at -75°C, δ 7.72 (d, J= 7.82 Hz, 1H, 2-H in Cp<sup>Py</sup>), 7.46 (d, J= 4.63 Hz, 1H, 4-H in Cp<sup>Py</sup>), 6.85 (br.t, J= 3.67 Hz, 1H, 6-H in Cp<sup>Py</sup>), 6.38 (dd, J= 7.57 Hz, J= 5.12 Hz, 1H, 3-H in Cp<sup>Py</sup>), 6.00 (d, J= 2.44 Hz, 1H, 7-H in Cp<sup>Py</sup>), 5.79 (br.s, 1H, 5-H in Cp<sup>Py</sup>), 2.92 (br.s, 18H, Zr(NMe<sub>2</sub>)<sub>3</sub>), 2.53 (br.s, 1H, Zr(HNMe<sub>2</sub>)), 2.25 (br.s, 6H, Zr(HNMe<sub>2</sub>)). <sup>13</sup>C{<sup>1</sup>H} NMR (CD<sub>2</sub>Cl<sub>2</sub>, -75°C):<sup>10</sup> δ 142.6 (8-C in Cp<sup>Py</sup>), 137.7 (2-C in Cp<sup>Py</sup>), 128.4 (4-C in Cp<sup>Py</sup>), 126.9 (9-C in Cp<sup>Py</sup>), 125.1 (6-C in Cp<sup>Py</sup>), 106.4 (3-C in Cp<sup>Py</sup>), 95.9 (7-C in Cp<sup>Py</sup>), 93.1 (5-C in Cp<sup>Py</sup>), 43.1 (Zr(NMe<sub>2</sub>)<sub>3</sub>), 40.5 (Zr(HNMe<sub>2</sub>)).

### Computational data for 3

HyperChem log start -- Mon Nov 06 20:22:24 2000.

Geometry optimization, SemiEmpirical, molecule = C:\Program Files\Hyper5\Program\pyrZr\_6.hin.

ZINDO1

PolakRibiere optimizer

Convergence limit = 0.0100000 Iteration limit = 50

Overlap weighting factors: P(Sigma-Sigma) = 1.0000 and P(Pi-Pi) = 1.0000

Accelerate convergence = YES

Optimization algorithm = Polak-Ribiere

Criterion of RMS gradient = 0.0100 kcal/(A mol) Maximum cycles = 795

UHF Calculation:

Singlet state calculation

Number of electrons = 124

in which

Number of Alpha Electrons = 62

Number of Beta Electrons = 62

Charge on the System = 0

Total Orbitals = 124

Starting ZINDO/1 calculation with 124 orbitals

E=0.0000 Grad=0.000 Conv=NO(0 cycles 0 points) [Iter=1 Diff=37363.78299]  
 E=0.0000 Grad=0.000 Conv=NO(0 cycles 0 points) [Iter=2 Diff=366.24971]  
 E=0.0000 Grad=0.000 Conv=NO(0 cycles 0 points) [Iter=3 Diff=32.89089]  
 E=0.0000 Grad=0.000 Conv=NO(0 cycles 0 points) [Iter=4 Diff=72.41715]  
 E=0.0000 Grad=0.000 Conv=NO(0 cycles 0 points) [Iter=5 Diff=77.73457]  
 E=0.0000 Grad=0.000 Conv=NO(0 cycles 0 points) [Iter=6 Diff=26.98125]  
 E=0.0000 Grad=0.000 Conv=NO(0 cycles 0 points) [Iter=7 Diff=3.34018]  
 E=0.0000 Grad=0.000 Conv=NO(0 cycles 0 points) [Iter=8 Diff=0.27395]  
 E=0.0000 Grad=0.000 Conv=NO(0 cycles 0 points) [Iter=9 Diff=0.02895]  
 E=0.0000 Grad=0.000 Conv=NO(0 cycles 0 points) [Iter=10 Diff=0.00402]  
 E=-14189.0908 Grad=0.015 Conv=NO(0 cycles 1 points) [Iter=1 Diff=0.00005]  
 E=-14189.0908 Grad=0.013 Conv=NO(0 cycles 2 points) [Iter=1 Diff=0.00000]  
 E=-14189.0908 Grad=0.014 Conv=NO(0 cycles 3 points) [Iter=1 Diff=0.00000]  
 E=-14189.0908 Grad=0.007 Conv=YES(1 cycles 4 points) [Iter=1 Diff=0.00000]

#### ENERGIES AND GRADIENT

Total Energy = -113835.7533673 (kcal/mol)  
 Total Energy = -181.405198203 (a.u.)  
 Binding Energy = -14189.0907314 (kcal/mol)  
 Isolated Atomic Energy = -99646.6626359 (kcal/mol)  
 Electronic Energy = -803348.1579997 (kcal/mol)  
 Core-Core Interaction = 689512.4046324 (kcal/mol)  
 Heat of Formation = -9129.1887314 (kcal/mol)  
 Gradient = 0.0075245 (kcal/mol/Ang)

#### MOLECULAR POINT GROUP

C1 >

#### EIGENVALUES(eV)

Alpha Orbitals:

|             |            |            |            |            |            |
|-------------|------------|------------|------------|------------|------------|
| Symmetry:   | 1 A        | 2 A        | 3 A        | 4 A        | 5 A        |
| Eigenvalue: | -54.567356 | -48.324810 | -46.871426 | -43.839657 | -42.750843 |
| Symmetry:   | 6 A        | 7 A        | 8 A        | 9 A        | 10 A       |
| Eigenvalue: | -41.596039 | -38.537838 | -34.555733 | -33.443981 | -32.512543 |
| Symmetry:   | 11 A       | 12 A       | 13 A       | 14 A       | 15 A       |
| Eigenvalue: | -31.670666 | -31.035582 | -29.990421 | -28.973177 | -27.281281 |
| Symmetry:   | 16 A       | 17 A       | 18 A       | 19 A       | 20 A       |
| Eigenvalue: | -25.931948 | -25.488653 | -24.162676 | -24.050070 | -23.826939 |
| Symmetry:   | 21 A       | 22 A       | 23 A       | 24 A       | 25 A       |
| Eigenvalue: | -23.712851 | -22.954769 | -22.669741 | -21.661386 | -20.331520 |
| Symmetry:   | 26 A       | 27 A       | 28 A       | 29 A       | 30 A       |
| Eigenvalue: | -19.805887 | -19.633438 | -19.474733 | -18.877392 | -18.069117 |
| Symmetry:   | 31 A       | 32 A       | 33 A       | 34 A       | 35 A       |
| Eigenvalue: | -18.033173 | -17.965025 | -17.366579 | -17.085218 | -16.568018 |
| Symmetry:   | 36 A       | 37 A       | 38 A       | 39 A       | 40 A       |
| Eigenvalue: | -16.527809 | -16.238716 | -15.447005 | -14.852564 | -14.365267 |
| Symmetry:   | 41 A       | 42 A       | 43 A       | 44 A       | 45 A       |
| Eigenvalue: | -14.165562 | -13.943611 | -13.803857 | -13.283681 | -12.944793 |
| Symmetry:   | 46 A       | 47 A       | 48 A       | 49 A       | 50 A       |
| Eigenvalue: | -12.340197 | -12.244691 | -11.477256 | -11.035009 | -10.934182 |
| Symmetry:   | 51 A       | 52 A       | 53 A       | 54 A       | 55 A       |
| Eigenvalue: | -10.606629 | -10.581017 | -9.576185  | -9.250910  | -8.677772  |
| Symmetry:   | 56 A       | 57 A       | 58 A       | 59 A       | 60 A       |
| Eigenvalue: | -8.100236  | -7.932530  | -7.413867  | -6.993096  | -6.268547  |
| Symmetry:   | 61 A       | 62 A       | 63 A       | 64 A       | 65 A       |
| Eigenvalue: | -5.732939  | -5.271911  | 4.399101   | 5.249022   | 5.516120   |
| Symmetry:   | 66 A       | 67 A       | 68 A       | 69 A       | 70 A       |
| Eigenvalue: | 5.718116   | 5.997530   | 6.789362   | 7.269477   | 7.766924   |
| Symmetry:   | 71 A       | 72 A       | 73 A       | 74 A       | 75 A       |
| Eigenvalue: | 7.982682   | 8.051976   | 8.630852   | 9.811058   | 10.077785  |
| Symmetry:   | 76 A       | 77 A       | 78 A       | 79 A       | 80 A       |
| Eigenvalue: | 10.198258  | 10.638333  | 10.915113  | 11.271956  | 11.292853  |
| Symmetry:   | 81 A       | 82 A       | 83 A       | 84 A       | 85 A       |
| Eigenvalue: | 11.569613  | 11.742179  | 11.976271  | 12.305321  | 12.410294  |

|                |            |            |            |            |            |
|----------------|------------|------------|------------|------------|------------|
| Symmetry:      | 86 A       | 87 A       | 88 A       | 89 A       | 90 A       |
| Eigenvalue:    | 12.476222  | 12.626031  | 12.729144  | 12.902426  | 12.943390  |
| Symmetry:      | 91 A       | 92 A       | 93 A       | 94 A       | 95 A       |
| Eigenvalue:    | 13.078467  | 13.267961  | 13.413451  | 13.487084  | 13.579250  |
| Symmetry:      | 96 A       | 97 A       | 98 A       | 99 A       | 100 A      |
| Eigenvalue:    | 13.683575  | 13.879293  | 14.108225  | 14.163854  | 14.327675  |
| Symmetry:      | 101 A      | 102 A      | 103 A      | 104 A      | 105 A      |
| Eigenvalue:    | 14.339141  | 14.362899  | 14.417199  | 14.505264  | 14.659489  |
| Symmetry:      | 106 A      | 107 A      | 108 A      | 109 A      | 110 A      |
| Eigenvalue:    | 14.730571  | 14.840830  | 14.915606  | 15.025861  | 15.052179  |
| Symmetry:      | 111 A      | 112 A      | 113 A      | 114 A      | 115 A      |
| Eigenvalue:    | 15.069099  | 15.160592  | 15.266713  | 15.560788  | 15.658899  |
| Symmetry:      | 116 A      | 117 A      | 118 A      | 119 A      | 120 A      |
| Eigenvalue:    | 15.877993  | 16.150078  | 16.652456  | 17.210381  | 17.231588  |
| Symmetry:      | 121 A      | 122 A      | 123 A      | 124 A      |            |
| Eigenvalue:    | 17.293137  | 17.306273  | 17.758524  | 18.690790  |            |
| Beta Orbitals: |            |            |            |            |            |
| Symmetry:      | 1 A        | 2 A        | 3 A        | 4 A        | 5 A        |
| Eigenvalue:    | -54.567356 | -48.324810 | -46.871426 | -43.839657 | -42.750843 |
| Symmetry:      | 6 A        | 7 A        | 8 A        | 9 A        | 10 A       |
| Eigenvalue:    | -41.596039 | -38.537838 | -34.555733 | -33.443981 | -32.512543 |
| Symmetry:      | 11 A       | 12 A       | 13 A       | 14 A       | 15 A       |
| Eigenvalue:    | -31.670666 | -31.035582 | -29.990421 | -28.973177 | -27.281281 |
| Symmetry:      | 16 A       | 17 A       | 18 A       | 19 A       | 20 A       |
| Eigenvalue:    | -25.931948 | -25.488653 | -24.162676 | -24.050070 | -23.826939 |
| Symmetry:      | 21 A       | 22 A       | 23 A       | 24 A       | 25 A       |
| Eigenvalue:    | -23.712851 | -22.954769 | -22.669741 | -21.661386 | -20.331520 |
| Symmetry:      | 26 A       | 27 A       | 28 A       | 29 A       | 30 A       |
| Eigenvalue:    | -19.805887 | -19.633438 | -19.474733 | -18.877392 | -18.069117 |
| Symmetry:      | 31 A       | 32 A       | 33 A       | 34 A       | 35 A       |
| Eigenvalue:    | -18.033173 | -17.965025 | -17.366579 | -17.085218 | -16.568018 |
| Symmetry:      | 36 A       | 37 A       | 38 A       | 39 A       | 40 A       |
| Eigenvalue:    | -16.527809 | -16.238716 | -15.447005 | -14.852564 | -14.365267 |
| Symmetry:      | 41 A       | 42 A       | 43 A       | 44 A       | 45 A       |

Eigenvalue: -14.165562 -13.943611 -13.803857 -13.283681 -12.944793  
Symmetry: 46 A 47 A 48 A 49 A 50 A  
Eigenvalue: -12.340198 -12.244691 -11.477255 -11.035009 -10.934182  
Symmetry: 51 A 52 A 53 A 54 A 55 A  
Eigenvalue: -10.606629 -10.581017 -9.576185 -9.250910 -8.677771  
Symmetry: 56 A 57 A 58 A 59 A 60 A  
Eigenvalue: -8.100235 -7.932529 -7.413866 -6.993096 -6.268546  
Symmetry: 61 A 62 A 63 A 64 A 65 A  
Eigenvalue: -5.732939 -5.271910 4.399101 5.249022 5.516120  
Symmetry: 66 A 67 A 68 A 69 A 70 A  
Eigenvalue: 5.718115 5.997530 6.789362 7.269477 7.766924  
Symmetry: 71 A 72 A 73 A 74 A 75 A  
Eigenvalue: 7.982682 8.051976 8.630852 9.811058 10.077785  
Symmetry: 76 A 77 A 78 A 79 A 80 A  
Eigenvalue: 10.198258 10.638333 10.915113 11.271956 11.292853  
Symmetry: 81 A 82 A 83 A 84 A 85 A  
Eigenvalue: 11.569613 11.742180 11.976271 12.305321 12.410294  
Symmetry: 86 A 87 A 88 A 89 A 90 A  
Eigenvalue: 12.476222 12.626031 12.729144 12.902426 12.943390  
Symmetry: 91 A 92 A 93 A 94 A 95 A  
Eigenvalue: 13.078467 13.267961 13.413451 13.487083 13.579250  
Symmetry: 96 A 97 A 98 A 99 A 100 A  
Eigenvalue: 13.683575 13.879293 14.108225 14.163853 14.327677  
Symmetry: 101 A 102 A 103 A 104 A 105 A  
Eigenvalue: 14.339141 14.362899 14.417199 14.505264 14.659489  
Symmetry: 106 A 107 A 108 A 109 A 110 A  
Eigenvalue: 14.730571 14.840830 14.915606 15.025861 15.052179  
Symmetry: 111 A 112 A 113 A 114 A 115 A  
Eigenvalue: 15.069099 15.160592 15.266713 15.560788 15.658899  
Symmetry: 116 A 117 A 118 A 119 A 120 A  
Eigenvalue: 15.877993 16.150078 16.652456 17.210381 17.231588  
Symmetry: 121 A 122 A 123 A 124 A  
Eigenvalue: 17.293137 17.306273 17.758524 18.690790

## ATOMIC ORBITAL ELECTRON POPULATIONS

Alpha Orbitals:

|     |           |           |           |           |           |
|-----|-----------|-----------|-----------|-----------|-----------|
| AO: | 16 S Zr   | 16 Px Zr  | 16 Py Zr  | 16 Pz Zr  | 16 Dz2 Zr |
|     | 0.218373  | 0.192878  | 0.206867  | 0.141032  | 0.180695  |
| AO: | 16 Dxz Zr | 16 Dyx Zr | 16 Dx2 Zr | 16 Dxy Zr | 2 S C     |
|     | 0.235940  | 0.222744  | 0.226018  | 0.230465  | 0.527612  |
| AO: | 2 Px C    | 2 Py C    | 2 Pz C    | 3 S C     | 3 Px C    |
|     | 0.507487  | 0.491680  | 0.538447  | 0.533566  | 0.475349  |
| AO: | 3 Py C    | 3 Pz C    | 4 S N     | 4 Px N    | 4 Py N    |
|     | 0.475767  | 0.442355  | 0.755521  | 0.718591  | 0.536228  |
| AO: | 4 Pz N    | 5 S C     | 5 Px C    | 5 Py C    | 5 Pz C    |
|     | 0.623876  | 0.512638  | 0.478657  | 0.449701  | 0.475184  |
| AO: | 6 S C     | 6 Px C    | 6 Py C    | 6 Pz C    | 7 S C     |
|     | 0.508076  | 0.508359  | 0.474197  | 0.516195  | 0.521513  |
| AO: | 7 Px C    | 7 Py C    | 7 Pz C    | 8 S C     | 8 Px C    |
|     | 0.504296  | 0.492896  | 0.517181  | 0.522242  | 0.498647  |
| AO: | 8 Py C    | 8 Pz C    | 9 S C     | 9 Px C    | 9 Py C    |
|     | 0.484841  | 0.492993  | 0.524151  | 0.481648  | 0.497807  |
| AO: | 9 Pz C    | 1 S C     | 1 Px C    | 1 Py C    | 1 Pz C    |
|     | 0.546730  | 0.529834  | 0.474758  | 0.511102  | 0.472623  |
| AO: | 17 S N    | 17 Px N   | 17 Py N   | 17 Pz N   | 18 S N    |
|     | 0.635800  | 0.555023  | 0.833029  | 0.596067  | 0.633832  |
| AO: | 18 Px N   | 18 Py N   | 18 Pz N   | 19 S N    | 19 Px N   |
|     | 0.800722  | 0.565668  | 0.631495  | 0.638631  | 0.672156  |
| AO: | 19 Py N   | 19 Pz N   | 20 S N    | 20 Px N   | 20 Py N   |
|     | 0.581431  | 0.746325  | 0.641372  | 0.769986  | 0.586446  |
| AO: | 20 Pz N   | 21 S C    | 21 Px C   | 21 Py C   | 21 Pz C   |
|     | 0.565967  | 0.525758  | 0.496574  | 0.504310  | 0.473022  |
| AO: | 22 S C    | 22 Px C   | 22 Py C   | 22 Pz C   | 24 S C    |
|     | 0.528340  | 0.466759  | 0.505326  | 0.502925  | 0.541032  |
| AO: | 24 Px C   | 24 Py C   | 24 Pz C   | 25 S C    | 25 Px C   |
|     | 0.517468  | 0.463573  | 0.516824  | 0.532216  | 0.497781  |
| AO: | 25 Py C   | 25 Pz C   | 26 S C    | 26 Px C   | 26 Py C   |
|     | 0.492718  | 0.501522  | 0.527415  | 0.483299  | 0.495608  |

|     |          |          |          |          |          |
|-----|----------|----------|----------|----------|----------|
| AO: | 26 Pz C  | 27 S C   | 27 Px C  | 27 Py C  | 27 Pz C  |
|     | 0.491809 | 0.526613 | 0.498388 | 0.473466 | 0.500304 |
| AO: | 28 S C   | 28 Px C  | 28 Py C  | 28 Pz C  | 29 S C   |
|     | 0.521447 | 0.497804 | 0.490268 | 0.485591 | 0.534361 |
| AO: | 29 Px C  | 29 Py C  | 29 Pz C  | 23 S H   | 11 S H   |
|     | 0.503082 | 0.472537 | 0.503478 | 0.424357 | 0.475025 |
| AO: | 12 S H   | 13 S H   | 14 S H   | 15 S H   | 10 S H   |
|     | 0.482407 | 0.472984 | 0.463117 | 0.472346 | 0.489291 |
| AO: | 30 S H   | 31 S H   | 32 S H   | 33 S H   | 34 S H   |
|     | 0.496298 | 0.489124 | 0.494947 | 0.494700 | 0.495700 |
| AO: | 35 S H   | 36 S H   | 37 S H   | 38 S H   | 39 S H   |
|     | 0.494009 | 0.492087 | 0.468246 | 0.498140 | 0.499654 |
| AO: | 40 S H   | 41 S H   | 42 S H   | 43 S H   | 44 S H   |
|     | 0.473870 | 0.491437 | 0.495675 | 0.500560 | 0.495194 |
| AO: | 45 S H   | 46 S H   | 47 S H   | 48 S H   | 49 S H   |
|     | 0.499625 | 0.496215 | 0.500041 | 0.484749 | 0.477055 |
| AO: | 50 S H   | 51 S H   | 52 S H   | 53 S H   |          |
|     | 0.468111 | 0.483685 | 0.470356 | 0.457664 |          |

## Beta Orbitals:

|     |           |           |           |           |           |
|-----|-----------|-----------|-----------|-----------|-----------|
| AO: | 16 S Zr   | 16 Px Zr  | 16 Py Zr  | 16 Pz Zr  | 16 Dz2 Zr |
|     | 0.218373  | 0.192878  | 0.206867  | 0.141032  | 0.180696  |
| AO: | 16 Dxz Zr | 16 Dyz Zr | 16 Dx2 Zr | 16 Dxy Zr | 2 S C     |
|     | 0.235940  | 0.222744  | 0.226018  | 0.230465  | 0.527612  |
| AO: | 2 Px C    | 2 Py C    | 2 Pz C    | 3 S C     | 3 Px C    |
|     | 0.507487  | 0.491680  | 0.538447  | 0.533566  | 0.475349  |
| AO: | 3 Py C    | 3 Pz C    | 4 S N     | 4 Px N    | 4 Py N    |
|     | 0.475767  | 0.442356  | 0.755521  | 0.718591  | 0.536228  |
| AO: | 4 Pz N    | 5 S C     | 5 Px C    | 5 Py C    | 5 Pz C    |
|     | 0.623875  | 0.512638  | 0.478657  | 0.449701  | 0.475185  |
| AO: | 6 S C     | 6 Px C    | 6 Py C    | 6 Pz C    | 7 S C     |
|     | 0.508076  | 0.508359  | 0.474197  | 0.516195  | 0.521513  |
| AO: | 7 Px C    | 7 Py C    | 7 Pz C    | 8 S C     | 8 Px C    |
|     | 0.504296  | 0.492896  | 0.517181  | 0.522242  | 0.498647  |
| AO: | 8 Py C    | 8 Pz C    | 9 S C     | 9 Px C    | 9 Py C    |



|     |          |          |          |          |          |
|-----|----------|----------|----------|----------|----------|
|     | 0.484841 | 0.492993 | 0.524151 | 0.481648 | 0.497807 |
| AO: | 9 Pz C   | 1 S C    | 1 Px C   | 1 Py C   | 1 Pz C   |
|     | 0.546730 | 0.529834 | 0.474758 | 0.511102 | 0.472624 |
| AO: | 17 S N   | 17 Px N  | 17 Py N  | 17 Pz N  | 18 S N   |
|     | 0.635800 | 0.555023 | 0.833029 | 0.596067 | 0.633832 |
| AO: | 18 Px N  | 18 Py N  | 18 Pz N  | 19 S N   | 19 Px N  |
|     | 0.800722 | 0.565668 | 0.631495 | 0.638631 | 0.672156 |
| AO: | 19 Py N  | 19 Pz N  | 20 S N   | 20 Px N  | 20 Py N  |
|     | 0.581431 | 0.746325 | 0.641372 | 0.769986 | 0.586446 |
| AO: | 20 Pz N  | 21 S C   | 21 Px C  | 21 Py C  | 21 Pz C  |
|     | 0.565967 | 0.525758 | 0.496574 | 0.504310 | 0.473022 |
| AO: | 22 S C   | 22 Px C  | 22 Py C  | 22 Pz C  | 24 S C   |
|     | 0.528340 | 0.466759 | 0.505326 | 0.502925 | 0.541032 |
| AO: | 24 Px C  | 24 Py C  | 24 Pz C  | 25 S C   | 25 Px C  |
|     | 0.517468 | 0.463573 | 0.516824 | 0.532216 | 0.497781 |
| AO: | 25 Py C  | 25 Pz C  | 26 S C   | 26 Px C  | 26 Py C  |
|     | 0.492718 | 0.501522 | 0.527415 | 0.483299 | 0.495608 |
| AO: | 26 Pz C  | 27 S C   | 27 Px C  | 27 Py C  | 27 Pz C  |
|     | 0.491809 | 0.526613 | 0.498388 | 0.473466 | 0.500304 |
| AO: | 28 S C   | 28 Px C  | 28 Py C  | 28 Pz C  | 29 S C   |
|     | 0.521447 | 0.497804 | 0.490268 | 0.485591 | 0.534362 |
| AO: | 29 Px C  | 29 Py C  | 29 Pz C  | 23 S H   | 11 S H   |
|     | 0.503082 | 0.472537 | 0.503479 | 0.424356 | 0.475025 |
| AO: | 12 S H   | 13 S H   | 14 S H   | 15 S H   | 10 S H   |
|     | 0.482407 | 0.472984 | 0.463117 | 0.472346 | 0.489291 |
| AO: | 30 S H   | 31 S H   | 32 S H   | 33 S H   | 34 S H   |
|     | 0.496298 | 0.489124 | 0.494947 | 0.494700 | 0.495700 |
| AO: | 35 S H   | 36 S H   | 37 S H   | 38 S H   | 39 S H   |
|     | 0.494009 | 0.492087 | 0.468246 | 0.498140 | 0.499654 |
| AO: | 40 S H   | 41 S H   | 42 S H   | 43 S H   | 44 S H   |
|     | 0.473870 | 0.491437 | 0.495675 | 0.500560 | 0.495194 |
| AO: | 45 S H   | 46 S H   | 47 S H   | 48 S H   | 49 S H   |
|     | 0.499625 | 0.496215 | 0.500041 | 0.484749 | 0.477055 |
| AO: | 50 S H   | 51 S H   | 52 S H   | 53 S H   |          |

0.468111 0.483685 0.470356 0.457664

## NET CHARGES AND COORDINATES

| Atom   | Z  | Charge    | Coordinates(Angstrom) |          |          | Mass     |
|--------|----|-----------|-----------------------|----------|----------|----------|
|        |    |           | x                     | y        | z        |          |
| Zr(16) | 40 | 0.289976  | -0.57741              | 0.71278  | -0.47903 | 91.22000 |
| C(2)   | 6  | -0.130453 | -0.63709              | -2.57975 | 2.20895  | 12.01100 |
| C(3)   | 6  | 0.145925  | 0.60393               | -2.66750 | 1.51352  | 12.01100 |
| N(4)   | 7  | -0.268431 | 1.41196               | -1.62895 | 1.26345  | 14.00700 |
| C(5)   | 6  | 0.167640  | 0.83078               | -0.38711 | 1.42968  | 12.01100 |
| C(6)   | 6  | -0.013654 | -0.50502              | -0.19124 | 1.97568  | 12.01100 |
| C(7)   | 6  | -0.071772 | -0.73486              | 1.23852  | 2.04697  | 12.01100 |
| C(8)   | 6  | 0.002554  | 0.44979               | 1.89413  | 1.60205  | 12.01100 |
| C(9)   | 6  | -0.100671 | 1.39763               | 0.91465  | 1.16385  | 12.01100 |
| C(1)   | 6  | 0.023366  | -1.22813              | -1.35174 | 2.40875  | 12.01100 |
| N(17)  | 7  | -0.239839 | 1.02025               | 1.36720  | -1.91791 | 14.00700 |
| N(18)  | 7  | -0.263433 | -0.70415              | -1.39491 | -1.27119 | 14.00700 |
| N(19)  | 7  | -0.277086 | -1.87722              | 2.50838  | -0.99213 | 14.00700 |
| N(20)  | 7  | -0.127542 | -3.13420              | -0.06702 | -0.08314 | 14.00700 |
| C(21)  | 6  | 0.000672  | 0.55276               | 1.67675  | -3.22858 | 12.01100 |
| C(22)  | 6  | -0.006699 | 2.42832               | 1.53369  | -1.87024 | 12.01100 |
| C(24)  | 6  | -0.077793 | -3.20324              | -1.36865 | 0.50481  | 12.01100 |
| C(25)  | 6  | -0.048474 | -3.87787              | 0.88230  | 0.68754  | 12.01100 |
| C(26)  | 6  | 0.003736  | -2.98451              | 2.48814  | -1.88207 | 12.01100 |
| C(27)  | 6  | 0.002457  | -1.58629              | 3.84191  | -0.59674 | 12.01100 |
| C(28)  | 6  | 0.009780  | -1.41861              | -1.15304 | -2.48125 | 12.01100 |
| C(29)  | 6  | -0.026919 | -0.50538              | -2.74665 | -0.91348 | 12.01100 |
| H(23)  | 1  | 0.151287  | -3.53900              | -0.09428 | -1.05930 | 1.00800  |
| H(11)  | 1  | 0.049951  | -1.10657              | -3.50196 | 2.56507  | 1.00800  |
| H(12)  | 1  | 0.035186  | -2.09327              | -1.23829 | 3.07688  | 1.00800  |
| H(13)  | 1  | 0.054032  | -1.60023              | 1.72084  | 2.51271  | 1.00800  |
| H(14)  | 1  | 0.073765  | 2.42631               | 1.11731  | 0.84794  | 1.00800  |
| H(15)  | 1  | 0.055307  | 0.62723               | 2.97433  | 1.63862  | 1.00800  |
| H(10)  | 1  | 0.021419  | 1.08684               | -3.65240 | 1.41993  | 1.00800  |

|       |   |           |          |          |          |         |
|-------|---|-----------|----------|----------|----------|---------|
| H(30) | 1 | 0.007405  | 0.99390  | 1.00724  | -3.98768 | 1.00800 |
| H(31) | 1 | 0.021751  | -0.54622 | 1.59160  | -3.32696 | 1.00800 |
| H(32) | 1 | 0.010107  | 0.81781  | 2.70903  | -3.51705 | 1.00800 |
| H(33) | 1 | 0.010600  | 2.94504  | 0.84181  | -2.55753 | 1.00800 |
| H(34) | 1 | 0.008600  | 2.72852  | 2.55750  | -2.15328 | 1.00800 |
| H(35) | 1 | 0.011981  | 2.82451  | 1.34576  | -0.85677 | 1.00800 |
| H(36) | 1 | 0.015825  | 0.13084  | -3.27441 | -1.64416 | 1.00800 |
| H(37) | 1 | 0.063508  | -0.00256 | -2.82603 | 0.09122  | 1.00800 |
| H(38) | 1 | 0.003720  | -1.45625 | -3.30382 | -0.83631 | 1.00800 |
| H(39) | 1 | 0.000693  | -2.40287 | -1.65562 | -2.49828 | 1.00800 |
| H(40) | 1 | 0.052259  | -1.62072 | -0.06448 | -2.65187 | 1.00800 |
| H(41) | 1 | 0.017126  | -0.86157 | -1.50391 | -3.36749 | 1.00800 |
| H(42) | 1 | 0.008649  | -1.34962 | 4.48722  | -1.46050 | 1.00800 |
| H(43) | 1 | -0.001119 | -2.43948 | 4.30750  | -0.07188 | 1.00800 |
| H(44) | 1 | 0.009612  | -0.72230 | 3.88901  | 0.08965  | 1.00800 |
| H(45) | 1 | 0.000750  | -3.87226 | 2.98462  | -1.45021 | 1.00800 |
| H(46) | 1 | 0.007570  | -2.75927 | 3.01042  | -2.82908 | 1.00800 |
| H(47) | 1 | -0.000083 | -3.28965 | 1.45973  | -2.15012 | 1.00800 |
| H(48) | 1 | 0.030503  | -4.91986 | 0.56062  | 0.84282  | 1.00800 |
| H(49) | 1 | 0.045889  | -3.41131 | 1.01895  | 1.67566  | 1.00800 |
| H(50) | 1 | 0.063778  | -3.89134 | 1.85434  | 0.16516  | 1.00800 |
| H(51) | 1 | 0.032630  | -4.22237 | -1.62370 | 0.83533  | 1.00800 |
| H(52) | 1 | 0.059287  | -2.86835 | -2.13542 | -0.21328 | 1.00800 |
| H(53) | 1 | 0.084672  | -2.51403 | -1.41774 | 1.38682  | 1.00800 |

| Dipole (Debyes) | x      | y      | z      | Total |
|-----------------|--------|--------|--------|-------|
| Point-Chg.      | -3.453 | -1.630 | 3.197  | 4.980 |
| sp Hybrid       | -3.606 | -0.010 | -1.452 | 3.887 |
| pd Hybrid       | -0.297 | -0.167 | 0.029  | 0.342 |
| Sum             | -7.356 | -1.807 | 1.774  | 7.780 |
